# Supplementary material for: Routine management, healthcare resource use and patient and carer‐reported outcomes of patients with transfusion‐dependent β‐thalassaemia in the United Kingdom: A mixed methods observational study
Source: PubMed Central journal article supplement (PMC9175788; doi:10.1002/jha2.282), 2021-09-08

## Supporting Information

### Supplementary tables

**Table S1. Questionnaires used to assess quality of life in patients and carers according to age category**

|                |           | Patients      |               |                            | Carers        |
|----------------|-----------|---------------|---------------|----------------------------|---------------|
|                |           | Adult         | Child         | Child proxy                |               |
| <b>EQ-5D</b>   | Age group | ≥16 years     | 8–15 years    | 4–7 years                  |               |
|                | Version   | EQ-5D-3L      | EQ-5D-Y       | EQ-5D-Y proxy <sup>†</sup> | EQ-5D-3L      |
| <b>TranQoL</b> | Age group | ≥18 years     | 7–17 years    | <7 years                   |               |
|                | Version   | TranQoL adult | TranQoL child | TranQoL proxy              | TranQoL adult |
| <b>WPAI</b>    | Age group | ≥18 years     | N/A           | N/A                        |               |
|                | Version   | WPAI-SHP      | N/A           | N/A                        | WPAI-CG       |

<sup>†</sup>Completed by carer on behalf of child aged 4–7 years (no version for those aged <4 years). N/A: questionnaire not applicable in children. TranQoL: transfusion dependent quality of life. WPAI-SHP: Work Productivity Activity Index for specific health problems. WPAI-CG: Work Productivity Activity Index for carers.

**Table S2. Hospital attendances and admissions during the study observation period**

| Hospital attendances and admissions during the observation period                  | Patients with TDT (n=165) |
|------------------------------------------------------------------------------------|---------------------------|
| Transfusion episodes/patient/year, mean ( $\pm$ SD)                                | 13.7 ( $\pm$ 3.2)         |
| Transfusion cross-match attendances/patient/year, mean ( $\pm$ SD)                 | 13.7 ( $\pm$ 3.2)         |
| Non-transfusion-related outpatient attendances/patient/year                        | 7.0 ( $\pm$ 7.8)          |
| Total non-transfusion-related outpatient attendances during the observation period | n=5461 (in 159 patients)  |
| Outpatient attendances by specialty, n (% of n=5461 attendances)                   | 4545 (83%)                |
| Haematology                                                                        | 143 (3%)                  |
| Ophthalmology                                                                      | 111 (2%)                  |
| Endocrinology                                                                      | 81 (1%)                   |
| Cardiology                                                                         | 76 (1%)                   |
| Audiology                                                                          | 2 (<1%)                   |
| Not known                                                                          | 503 (9%)                  |
| Other                                                                              |                           |
| Non-transfusion-related day case admissions/patient/year                           | 0.5 ( $\pm$ 1.6)          |
| Total non-transfusion-related day case admissions during the observation period    | n=387 (in 51 patients)    |
| Day case admissions by specialty, n (% of n=387 admissions)                        |                           |
| Haematology                                                                        | 232 (60%)                 |
| Radiology                                                                          | 98 (25%)                  |
| Ophthalmology                                                                      | 17 (4%)                   |
| Cardiology                                                                         | 9 (2%)                    |
| Gastroenterology                                                                   | 7 (2%)                    |

|                                                                                                                |                                    |                                        |
|----------------------------------------------------------------------------------------------------------------|------------------------------------|----------------------------------------|
|                                                                                                                | Audiology                          | 4 (1%)                                 |
|                                                                                                                | Other                              | 18 (5%)                                |
|                                                                                                                | Not known                          | 2 (1%)                                 |
| ED attendances/patient/year                                                                                    |                                    | 0.2 ( $\pm$ 0.4)                       |
| Total ED attendances during the observation period                                                             |                                    | n=144 (in 57 patients)                 |
| ED attendance only, n (% of n=144 attendances)                                                                 |                                    | 100 (69%)                              |
| ED attendance leading to admission, n (% of n=144 attendances)                                                 |                                    | 44 (31%)                               |
| Inpatient admissions/patient/year                                                                              |                                    | 0.1 ( $\pm$ 0.3)                       |
| Total inpatient admissions during the observation period                                                       |                                    | n=84 (in 41 patients)                  |
| Inpatient admissions by admission route/admitting specialty, n (% of n=84 admissions)                          |                                    |                                        |
|                                                                                                                | ED                                 | 44 (52%)                               |
|                                                                                                                | Haematology                        | 14 (17%)                               |
|                                                                                                                | Cardiology                         | 2 (2%)                                 |
|                                                                                                                | Endocrinology                      | 2 (2%)                                 |
|                                                                                                                | Other                              | 18 (21%)                               |
|                                                                                                                | Not known                          | 4 (5%)                                 |
| Length of stay for inpatient admissions (days), mean ( $\pm$ SD)                                               |                                    | 5.6 ( $\pm$ 6.2), n=84                 |
|                                                                                                                | <i>Inpatient admissions via ED</i> | <i>4.2 (<math>\pm</math>3.4), n=44</i> |
|                                                                                                                | <i>Non-ED-related admissions</i>   | <i>7.2 (<math>\pm</math>8.0), n=40</i> |
| Total non-transfusion-related hospital attendances and admissions <sup>†</sup> /patient/year, mean ( $\pm$ SD) |                                    | 7.8 ( $\pm$ 8.1)                       |

<sup>†</sup>Includes: all non-transfusion-related outpatient, Emergency Department (ED), day case and inpatient admissions. SD: standard deviation. TDT: transfusion-dependent  $\beta$ -thalassaemia.

**Table S3. Routine management of TDT: iron chelation therapy**

| Iron burden and iron chelation therapy (ICT)                                              | Patients with TDT (n=165) |
|-------------------------------------------------------------------------------------------|---------------------------|
| Distribution of ICT during the observation period, n (% of patients)                      |                           |
| Deferasirox                                                                               | 132 (80%)                 |
| Deferiprone                                                                               | 57 (35%)                  |
| Desferrioxamine                                                                           | 85 (52%)                  |
| ICT ongoing at the end of the observation period, n (% of patients)                       |                           |
| n=162                                                                                     |                           |
| Deferasirox                                                                               | 94 (58%)                  |
| Deferiprone                                                                               | 11 (7%)                   |
| Desferrioxamine                                                                           | 23 (14%)                  |
| Combination therapy <sup>†</sup>                                                          | 34 (21%)                  |
| Discontinued <sup>‡</sup>                                                                 | 3                         |
| Patients with documented non-adherence events, n (% of patients)                          |                           |
| 41 (25%)                                                                                  |                           |
| Non-adherence to ICT during the observation period, n (% of patients taking chelator)     |                           |
| Deferasirox                                                                               |                           |
| Deferiprone                                                                               | 30/132 (23%)              |
| Desferrioxamine                                                                           | 7/57 (12%)                |
| Combination therapy                                                                       | 7/85 (8%)                 |
|                                                                                           | 1/34 (3%)                 |
| <b>Adverse events (AEs) associated with ICT<sup>§</sup> during the observation period</b> |                           |
| Patients with ≥1 AE associated with ICT                                                   |                           |
| 46 (28%)                                                                                  |                           |
| Distribution of AEs by type of chelator, number of AEs                                    |                           |
| Deferasirox                                                                               | 64                        |
| Deferiprone                                                                               | 9                         |
| Desferrioxamine                                                                           | 25                        |
| Combination therapy                                                                       | 4                         |
| Patients with adverse events on ICT, n (% of patients taking chelator)                    |                           |
| Deferasirox                                                                               | 37/132 (28%)              |
| Deferiprone                                                                               | 4/57 (7%)                 |
| Desferrioxamine                                                                           | 11/85 (13%)               |
| Combination therapy                                                                       | 2/34 (6%)                 |

AEs resulting in chelator therapy change, n (% of AEs associated with chelator)

|                     |             |
|---------------------|-------------|
| Deferasirox         | 32/64 (50%) |
| Deferiprone         | 5/9 (56%)   |
| Desferrioxamine     | 4/25 (16%)  |
| Combination therapy | 0/4 (0%)    |

Chelator therapy change as a result of AEs, n (% of AEs requiring therapy change)

|                                |          |
|--------------------------------|----------|
| Deferasirox discontinued       | 18 (56%) |
| Deferasirox dose reduced       | 14 (44%) |
| Deferiprone discontinued       | 4 (80%)  |
| Deferiprone dose reduced       | 1 (20%)  |
| Desferrioxamine discontinued   | 2 (50%)  |
| Desferrioxamine dose reduced   | 1 (25%)  |
| Desferrioxamine dose increased | 1 (25%)  |

AEs requiring treatment, n (% of AEs associated with chelator)

|                     |             |
|---------------------|-------------|
| Deferasirox         | 18/64 (28%) |
| Deferiprone         | 5/9 (56%)   |
| Desferrioxamine     | 12/25 (48%) |
| Combination therapy | 1/4 (25%)   |

---

<sup>†</sup>Combination therapy: n=18/162 (11%) deferiprone + desferrioxamine, n=8/162 (5%) deferasirox + deferiprone, n=8/162 (5%) deferasirox + desferrioxamine. <sup>‡</sup>Reasons for discontinuation: n=1 patient deceased, n=1 pregnancy, n=1 infection. <sup>c</sup>Adverse events based on physician documented assessment. TDT: transfusion-dependent  $\beta$ -thalassaemia.

**Table S4. Adverse events associated with use of iron chelation therapy**

| <b>Adverse events associated with iron chelation therapy <sup>†</sup></b> | <b>Number of adverse events</b> | <b>% of total adverse events for each chelator</b> |
|---------------------------------------------------------------------------|---------------------------------|----------------------------------------------------|
| <b>Deferasirox adverse events</b>                                         |                                 | <b>% (n = 64)</b>                                  |
| Abdominal pain                                                            | 19                              | 30%                                                |
| Hepatic impairment                                                        | 9                               | 14%                                                |
| Nausea                                                                    | 3                               | 5%                                                 |
| Renal impairment                                                          | 2                               | 3%                                                 |
| Chromaturia                                                               | 2                               | 3%                                                 |
| Rash                                                                      | 2                               | 3%                                                 |
| Pain or erythema at injection site                                        | 2                               | 3%                                                 |
| Diarrhoea                                                                 | 1                               | 2%                                                 |
| Increased liver transaminase                                              | 1                               | 2%                                                 |
| Vomiting                                                                  | 1                               | 2%                                                 |
| Other                                                                     | 22                              | 34%                                                |
| <b>Deferiprone adverse events</b>                                         |                                 | <b>% (n = 9)</b>                                   |
| Abdominal pain                                                            | 1                               | 11%                                                |
| Arthralgia                                                                | 1                               | 11%                                                |
| Hepatic impairment                                                        | 1                               | 11%                                                |
| Rash                                                                      | 1                               | 11%                                                |
| Other                                                                     | 5                               | 56%                                                |
| <b>Desferrioxamine adverse events</b>                                     |                                 | <b>% (n = 25)</b>                                  |
| Skin reactions or swelling                                                | 4                               | 16%                                                |
| Injection site reaction                                                   | 2                               | 8%                                                 |
| Pain or erythema at injection site                                        | 2                               | 8%                                                 |
| Abdominal pain                                                            | 1                               | 4%                                                 |
| Hepatic impairment                                                        | 1                               | 4%                                                 |
| Increased liver transaminase                                              | 1                               | 4%                                                 |
| Itching                                                                   | 1                               | 4%                                                 |
| Rapid heartbeat                                                           | 1                               | 4%                                                 |
| Other                                                                     | 12                              | 48%                                                |

<sup>†</sup>Adverse events based on physician documented assessment.

**Table S5. Patient and carer-reported outcomes questionnaires**

| Questionnaires                                        | Patients                                                                                                                                  | Carers                    |
|-------------------------------------------------------|-------------------------------------------------------------------------------------------------------------------------------------------|---------------------------|
| <b>EQ-5D-3L VAS scores, mean (<math>\pm</math>SD)</b> | $\geq 16$ years: 66.7 ( $\pm 20.4$ ), n=95<br>8–15 years: 73.0 ( $\pm 23.4$ ), n=20<br>4–7 years <sup>‡</sup> : 79.2 ( $\pm 20.4$ ), n=10 | 75.2 ( $\pm 16.5$ ), n=27 |
| <b>WPAI (%), mean (<math>\pm</math>SD)</b>            |                                                                                                                                           |                           |
| Absenteeism <sup>†</sup>                              | 10% ( $\pm 14$ ), n=44                                                                                                                    | 15% ( $\pm 14$ ), n=13    |
| Presenteeism <sup>†</sup>                             | 34% ( $\pm 29$ ), n=49                                                                                                                    | 24% ( $\pm 19$ ), n=16    |
| Work productivity <sup>†</sup>                        | 42% ( $\pm 28$ ), n=44                                                                                                                    | 36% ( $\pm 20$ ), n=13    |
| Activity impairment                                   | 48% ( $\pm 32$ ), n=88                                                                                                                    | 28% ( $\pm 23$ ), n=29    |
| <b>TranQoL, mean (<math>\pm</math>SD)</b>             | $\geq 18$ years: 58.6 ( $\pm 18.4$ ), n=94<br>7–17 years: 74.8 ( $\pm 15.0$ ), n=27<br><7 years <sup>‡</sup> : 78.1 ( $\pm 12.7$ ), n=13  | 63.2 ( $\pm 21.4$ ), n=37 |

<sup>†</sup>Only patients in employment. <sup>‡</sup>Proxy completed by carer of child in relation to the child. SD: standard deviation. TranQoL: transfusion dependent quality of life. VAS: visual analogue scale. WPAI: Work Productivity Activity Index.

## Supplementary figures

**Figure S1. Red blood cell transfusion episodes per year**

The number of blood transfusion episodes/year ranged from 6.0 to 31.8.

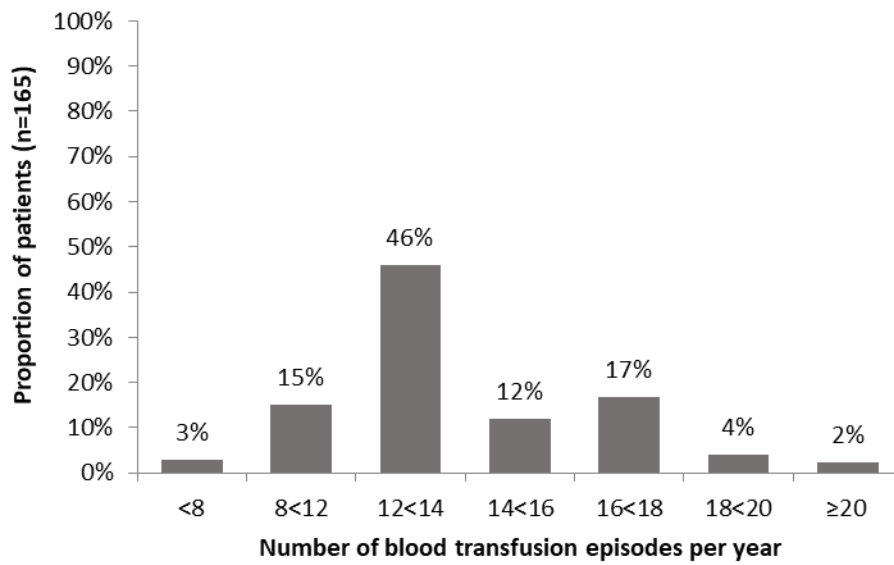



**Figure S2. Interval between liver and cardiac iron assessments during the observation period. Panel A:** Average interval between liver iron assessments (any protocol). **Panel B:** Average interval between cardiac iron assessments (any protocol). N/A: not applicable - patients did not have any assessment recorded during the observation period

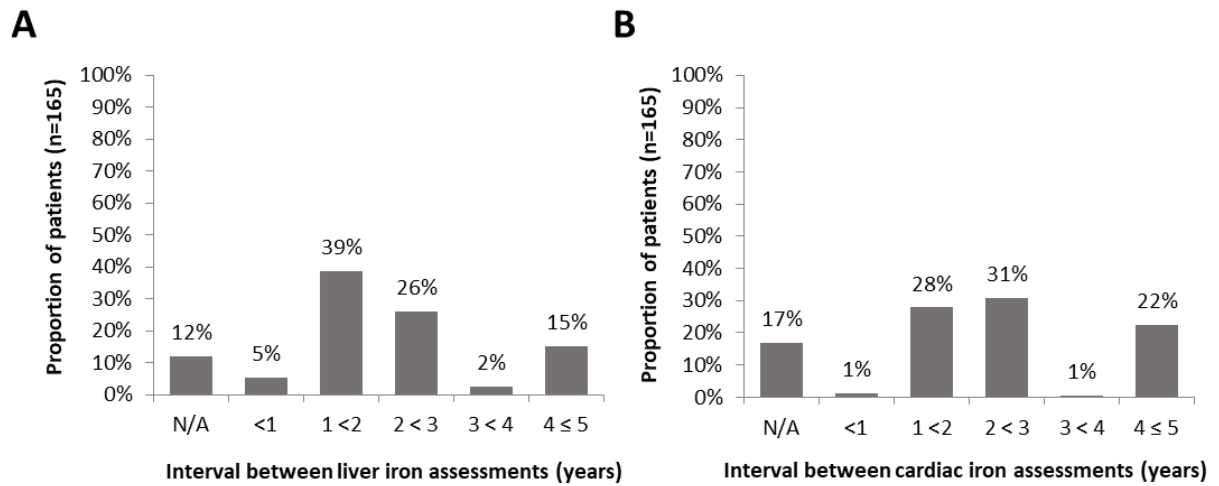

**Figure S3. Interval between liver and cardiac iron assessments, stratified by concentration at the last assessment during the observation period. Panel A: Average interval between liver iron assessments (any method of assessment reported in mg/g). Panel B: Average interval between cardiac iron assessments (any method of assessment reported in ms).**

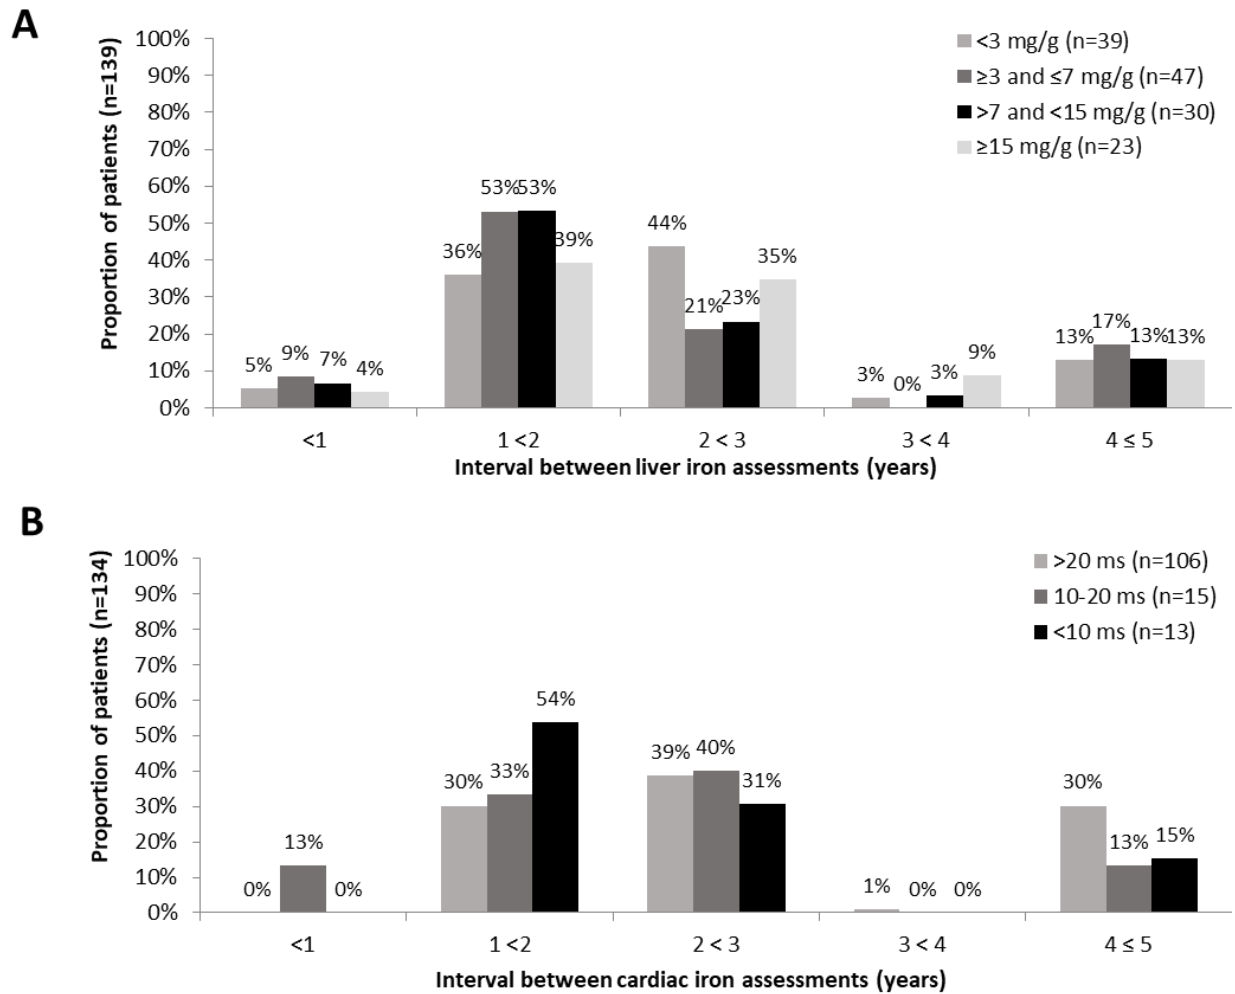

**Figure S4. Interval between liver and cardiac iron assessments, stratified by age at baseline. Panel A:** Average interval between liver iron assessments (any method of assessment). **Panel B:** Average interval between cardiac iron assessments (any method of assessment). N/A: not applicable - patients did not have any assessment recorded during the observation period

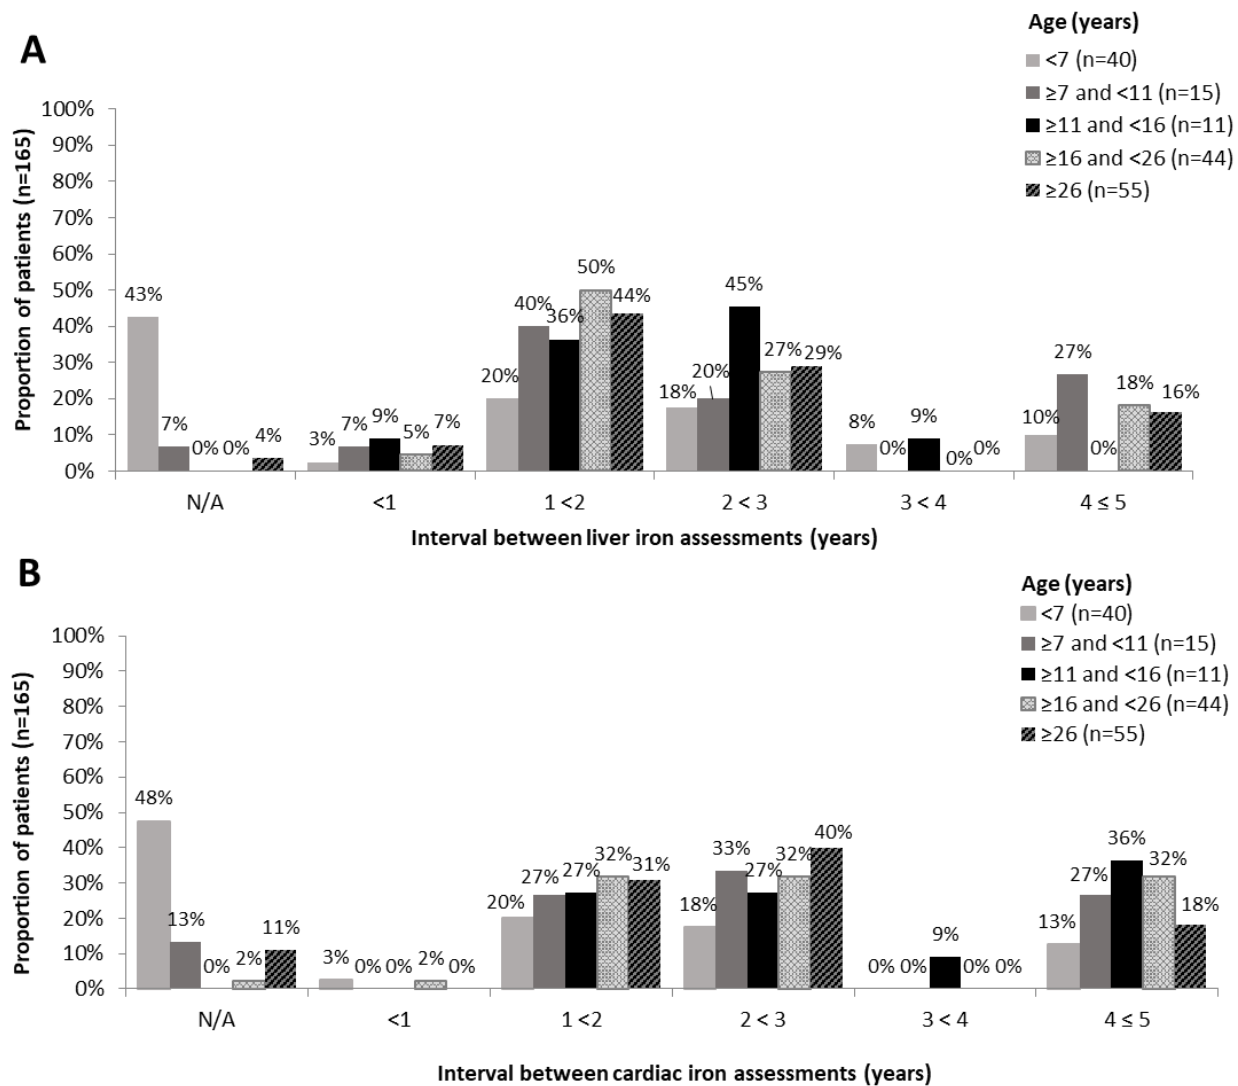

Supplement: JHA2-2-738-s001.pdf [file JHA2-2-738-s001.pdf]
